# Supplementary material
Source: Springer Nature journal article supplement (https://www.springermedizin.de/resource/supplementary/13054_2012_1772_MOESM3_ESM.pdf/9711622)

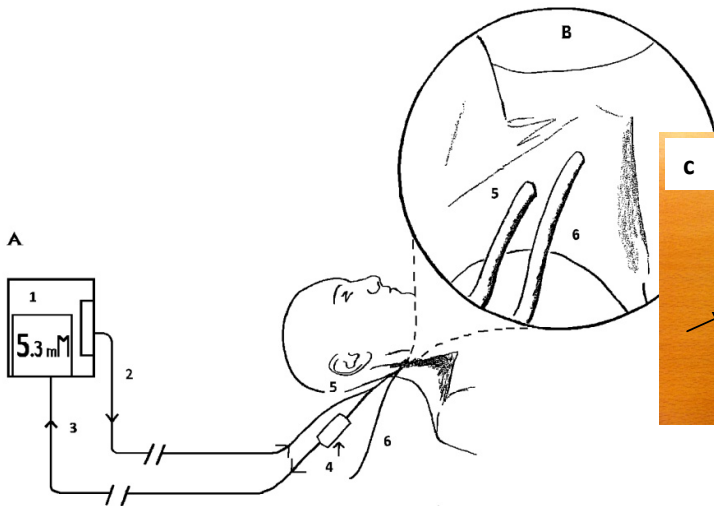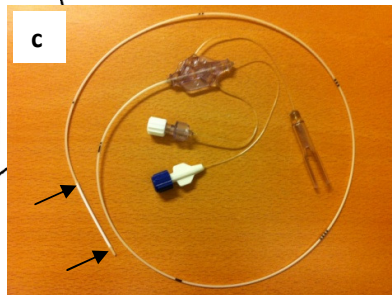

Supplement: MOESM3 [file 9711622]
